# Supplementary material for: Drug-drug interaction, adverse drug reaction and their determinants among adult hypertensive patients; Multicenter study in Ethiopia
Source: Research Square preprint supplement (doi:10.21203/rs.3.rs-8527897/v1), 2026-02-06
Supplement: Supplementary file 1 [file fb1842bcc63def0bf5f83966.docx]

# Annex I: data abstraction tool

**AMBO UNIVERSITY, COLLEGE OF HEALTH SCINCES AND REFFERAL HOSPITAL**

**“Quality clinical care, BP control rate and its determinant among adult hypertensive patients: The race against a silent killer”, West Shoa zone, Oromia region, Ethiopia**.

**PART I: SOCIO-DEMOGRAPHIC CHARACTERISTICS**

| **Socio-demographic Characteristics** | **Values** | **Remark** |
| --- | --- | --- |
| 1. Card No./Code |  |  |
| 1. Age (years) |  |  |
| 1. Sex | a) Male b) Female |  |
| 1. Religion | a) Muslim b) Orthodox c) protestant d) catholic  e) Other (specify)………. |  |
| 1. Marital status | 1. Single…... b) Married………   c) Divorced…. d) Widowed……. |  |
| 1. Education level | 1. Can’t read and write……. 2. Primary (1-8)………. 3. Secondary (9-12)…… 4. Tertiary (diploma and above)…… |  |
| 1. Place of residence | a) Rural……… b) Urban…….. |  |
| 1. How far is your home from this hospital? (Km) |  |  |
| 1. Occupation | | a) Unemployed  c) House wife  e) Student  f) Daily labor…… | b) Merchant  d) Farmer  g) gov’t employee  f) Other(s)  [Specify]:________________ | | --- | --- | |  |
| 1. Income (monthly in ETB) | 1. No constant income c) 1500- 6000 2. < 1500 d)>6000 |  |
| 1. Smoking status (currently) | 1. Yes b) No |  |
| 1. Alcohol drinker | a) yes b) No |  |
| 1. Exercise/ physical activity | 1. Yes b, No |  |
| 1. Khat chewer | 1. Yes b) No |  |
| 1. Salt consumption status | 1. Share family food without any concern for salt amount 2. Use food with low salt (which is prepared only for you) 3. Use salt free diet |  |
| 1. Drink Coffee | 1. Yes daily b) Yes sometimes c) No |  |
| 1. Weight (Kg) |  |  |
| 1. Height (Meter) |  |  |
| 1. BMI |  |  |
| 1. Waist circumference (inch) |  |  |
| 1. Hip circumference (inch) |  |  |
| 1. WHR |  |  |
| 1. Do you use herbal medicine? | 1. Yes… if yes for what purpose_____ 2. No |  |
| N.B: BMI- Body mass index; WHR- waist to hip ratio | |  |

**PART II: PATIENTS CLINICAL INFORMATION:**

1. Duration since Diagnosis of hypertension (in year) _____________________
2. Is there any history of admission in the last 6 months due to Hypertension or related CVD? a) yes b)No
3. If yes for history of admission, how many times?­_______________
4. Is there family history of hypertension? A) yes b) No
5. Frequency of follow up (commonly) in months? ________________________
6. Important Laboratory result (dyslipidemia for CVD risk identification)
7. Total cholesterol (mg/dl)______________ c) HDL(mg/dl)______________
8. LDL (mg/dl) ______________ d) TG(mg/dl)______________
9. **Common** frequency of BP measurement? A) daily b) weekly c) 2 weeks d) monthly e) 2 month f) irregular
10. **BP measurement ( record the most recent as visit 1) as SBP & DBP**

**8i) Visit 1___________ 8ii) Visit 2 ________________ 8iii) Visit 3____________**

1. Is there a co-morbid condition? a) Yes b) No……
2. If yes to question number 9, **Number of co morbidity (ask patient and cross check from medical chart) _______________**
3. If yes to question number 9, list co-morbid diseases [charlson comorbidity index; **CCI**)
4. ……………………..
5. ……………………..
6. ……………………..
7. …………………….
8. ……………………

12. Fill this table if the patient has co-morbidity (yes for Q. Number 9) otherwise skip. Age adjusted **Charlson co-morbidity index scoring** tool

| S. No. | Condition | Variable name | Points | Notes | Tick the one that apply (multiple answer is possible) |
| --- | --- | --- | --- | --- | --- |
| 1 | Age | AGE ≤ 50 | 0 |  |  |
| AGE 51 -60 | 1 |  |  |
| AGE 61 – 70 | 2 |  |  |
| AGE 71 – 80 | 3 |  |  |
| AGE >80 | 4 |  |  |
| 1 | Myocardial infarction | MI | 1 |  |  |
| 2 | Congestive heart failure | CHF | 1 |  |  |
| 3 | Peripheral vascular disease or bypass | PVD | 1 |  |  |
| 4 | Cerebrovascular disease or transient ischemic disease | CVD | 1 | CVA only |  |
| 5 | Hemiplegia | PLEGIA | 2 | If hemiplegia don’t count CVA separately |  |
| 6 | Pulmonary disease or asthma | COPD | 1 |  |  |
| 7 | Diabetes | DM | 1 | DM only |  |
| 8 | Diabetes with end organ damage | DMENDORGAN | 2 | If end organ damage don’t count DM separately |  |
| 9 | Renal disease | RENAL | 2 |  |  |
| 10 | Mild liver disease | MILDLIVER | 2 |  |  |
| 11 | Sever liver disease | SEVERLIVER | 3 |  |  |
| 12 | Gastric or peptic ulcer | ULCER | 1 |  |  |
| 13 | Cancer (lymphoma, leukemia or solid tumor) | CANCER | 2 | Non metastatic cancer only |  |
| 14 | Metastatic solid tumor | METASTASES | 6 | If metastatic don’t count cancer separately |  |
| 15 | Dementia or Alzheimer’s | DEMENTIA | 1 |  |  |
| 16 | Rheumatic or connective tissue disease | RHEUMATIC | 1 |  |  |
| 17 | HIV/AIDS | HIV | 6 |  |  |
| 18 | Hypertension | HTN | 1 |  |  |
| 19 | Skin ulcer or cellulitis | SKIN ULCER | 2 |  |  |
| 20 | Depression | DEPRESSION | 1 |  |  |
| 21 | Warfarin | WARFARIN | 1 |  |  |
| TOTAL score (0 to 43) | | |  |  |  |

In the development phase of the index, mortality for each disease was converted to a relative risk of death within 12 months. A weight was then assigned to each condition based on the relative risk (RR); for example, RR <1.2 = weight 0, RR ≥1.2<1.5 = weight 1, RR ≥1.5<2.5 = weight 2, RR ≥2.5<3.5= weight 3, and for 2 conditions (metastatic solid tumor and AIDS) = weight 6.

**PART III: PATIENTS MEDICATION INFORMATION**

1. Cost of health care covered: A, self-payment B, free
2. Duration since antihypertensive medication started (in year) _________________
3. Write **only** a**ntihypertensive** medication the patients has been using currently (**N.B if there is change in either dose or route or frequency or any other consider as new prescription and rewrite on new space)**

| Serial No. | Name of antihypertensive drug (**current**) | Indication (other than HTN) (skip this part if only HTN) | Dose | Frequency | Route | Started on (D/M/Y) | D/C (D/M/Y) |
| --- | --- | --- | --- | --- | --- | --- | --- |
| 1 |  |  |  |  |  |  |  |
| 2 |  |  |  |  |  |  |  |
| 3 |  |  |  |  |  |  |  |
| 4 |  |  |  |  |  |  |  |

1. Any current concurrent medications (all including antimicrobial and other than drugs mentioned in the above table) a) Yes……. b) No……
2. If yes to question No 4. Number of concurrent medications _________________
3. If yes to Q. No. 4, list those medications ______________________________________________________________________________________________________________________________________
4. Any side effect from medication? (**self-report**) a) yes b) no
5. If yes tick one of the following (multiple response);

8i) Weakness 8ii) Headache 8iii) Dry mouth 8iv) Erectile dysfunction 8V) GI complaint 8Vi) Cough 8Vii) Others (Specify) __________________

**Drug-drug interaction**

1. Is there a drug-drug interaction? (**Use Mediscape/** Micromedex and /or Hippocrates **Drug-drug interaction checker**) a) Yes b) No
2. If yes to above question (No 3), list those drugs involved in drug-drug interaction clearly …………………………………………………………………………………………………………………………………………………………………………………………………
3. If yes to above question (No 3), level of interaction (per Medscape and /or Micromedex and /or Hippocrates drug interaction checker),

a) Contra-indicated b) Serious c) Significant d) Minor

6. If yes to above question (No 3), list the clinical consequences of the DDI

------------------------------------------------------------------------------------------------------------------------------------------------------------------------------------------------------------------------------------------

7. If yes to above question (No 3), List the effect of DDI on Blood pressure (BP)

A, increase B. decrease C. no effect

1. If DDI has effect on BP, determine the severity (based on the Medscape DDI checker severity level).

A, Minor B. moderate/significant C. serious D. contraindicated

**PLEASE! Fill the following information.**

1. Name of data collector…………………………………… Signature………….Date………..
2. Name of Supervisory …………………………………... Signature………… Date………..

**THANK YOU FOR YOUR GENIUNE INFORMATION!!!**
